# Supplementary material for: Low Cost Activated Carbon for Removal of NOM and DBPs: Optimization and Comparison
Source: MDPI journal article supplement (doi:10.3390/w13162244), 2021-08-17
Supplement: s1 [file s1]

# Low cost Activated Carbon for the Reduction of NOM and DBPs: Optimization and Comparison

Hoda Tafvizi <sup>1</sup>, Shakhawat Chowdhury <sup>2,3</sup> and Tahir Husain <sup>1,\*</sup>

<sup>1</sup> Faculty of Engineering and Applied Science, Memorial University of Newfoundland, St John's, NL, A1B3X7, Canada; hoda.tafvizi@mun.ca

<sup>2</sup> Department of Civil and Environmental Engineering, King Fahd University of Petroleum & Minerals, Dhahran, 31261, Saudi Arabia; Schowdhury@kfupm.edu.sa

<sup>3</sup> Interdisciplinary Research Center for Membranes and Water Security, King Fahd University of Petroleum & Minerals, Dhahran 31261, Saudi Arabia

\* Correspondence: thusain@mun.ca; Tel.: +1-709-864-8781

**Table S1.** Experimental results for the optimization of adsorption capacity considering time, dose, and pH in terms of actual levels.

| Std | Time<br>A | Dose<br>B | pH<br>C | R1: DOC Removal | R2: qe (mg/g) |
|-----|-----------|-----------|---------|-----------------|---------------|
| 1   | 5.26      | 0.14      | 5.20    | 46.76           | 17.25         |
| 2   | 19.23     | 0.14      | 5.20    | 49.48           | 18.26         |
| 3   | 5.26      | 0.40      | 5.20    | 61.86           | 7.88          |
| 4   | 19.23     | 0.40      | 5.20    | 76.87           | 9.80          |
| 5   | 5.26      | 0.14      | 8.80    | 29.42           | 10.86         |
| 6   | 19.23     | 0.14      | 8.80    | 39.87           | 14.59         |
| 7   | 5.26      | 0.40      | 8.80    | 42.11           | 5.37          |
| 8   | 19.23     | 0.40      | 8.80    | 45.37           | 5.78          |
| 9   | 0.50      | 0.27      | 7.00    | 53.78           | 10.19         |
| 10  | 24.00     | 0.27      | 7.00    | 76.93           | 14.55         |
| 11  | 12.25     | 0.05      | 7.00    | 28.69           | 32.05         |
| 12  | 12.25     | 0.50      | 7.00    | 61.42           | 6.40          |
| 13  | 12.25     | 0.27      | 4.00    | 57.89           | 10.97         |
| 14  | 12.25     | 0.27      | 10.00   | 26.30           | 4.98          |
| 15  | 12.25     | 0.27      | 7.00    | 58.93           | 11.16         |
| 16  | 12.25     | 0.27      | 7.00    | 57.58           | 10.91         |
| 17  | 12.25     | 0.27      | 7.00    | 55.99           | 10.61         |

<sup>1</sup> Std: standard run number, R: response, a:1.68, qe: adsorption capacity (mg/g).

**Table S2.** ANOVA for quadratic model of DOC removal.

| Source         | Sum of Squares | df | Mean Square | F-value | p-value  |             |
|----------------|----------------|----|-------------|---------|----------|-------------|
| Model          | 1.59           | 9  | 0.1763      | 27.00   | 0.0001   | significant |
| A-Time         | 0.1147         | 1  | 0.1147      | 17.57   | 0.0041   | significant |
| B-Dose         | 0.4537         | 1  | 0.4537      | 69.48   | < 0.0001 | significant |
| C-pH           | 0.6238         | 1  | 0.6238      | 95.53   | < 0.0001 | significant |
| AB             | 0.0006         | 1  | 0.0006      | 0.0882  | 0.7751   |             |
| AC             | 0.0013         | 1  | 0.0013      | 0.2064  | 0.6634   |             |
| BC             | 0.0068         | 1  | 0.0068      | 1.04    | 0.3411   |             |
| A <sup>2</sup> | 0.0199         | 1  | 0.0199      | 3.05    | 0.1243   |             |
| B <sup>2</sup> | 0.1327         | 1  | 0.1327      | 20.33   | 0.0028   | significant |
| C <sup>2</sup> | 0.2036         | 1  | 0.2036      | 31.18   | 0.0008   | significant |
| Residual       | 0.0457         | 7  | 0.0065      |         |          |             |

df: degree of freedom.

**Table S3.** ANOVA for quadratic model of qe.

| Source         | Sum of Squares | df | Mean Square | F-value | p-value  |             |
|----------------|----------------|----|-------------|---------|----------|-------------|
| Model          | 3.64           | 9  | 0.4048      | 40.00   | < 0.0001 | significant |
| A-Time         | 0.1132         | 1  | 0.1132      | 11.18   | 0.0123   | significant |
| B-Dose         | 2.42           | 1  | 2.42        | 238.66  | < 0.0001 | significant |
| C-pH           | 0.6274         | 1  | 0.6274      | 61.98   | 0.0001   | significant |
| AB             | 0.0004         | 1  | 0.0004      | 0.0438  | 0.8403   |             |
| AC             | 0.0011         | 1  | 0.0011      | 0.1126  | 0.7471   |             |
| BC             | 0.0063         | 1  | 0.0063      | 0.6257  | 0.4549   |             |
| A <sup>2</sup> | 0.0074         | 1  | 0.0074      | 0.7294  | 0.4213   |             |
| B <sup>2</sup> | 0.0777         | 1  | 0.0777      | 7.68    | 0.0276   | significant |
| C <sup>2</sup> | 0.2564         | 1  | 0.2564      | 25.33   | 0.0015   | significant |
| Residual       | 0.0709         | 7  | 0.0101      |         |          |             |

df: degree of freedom

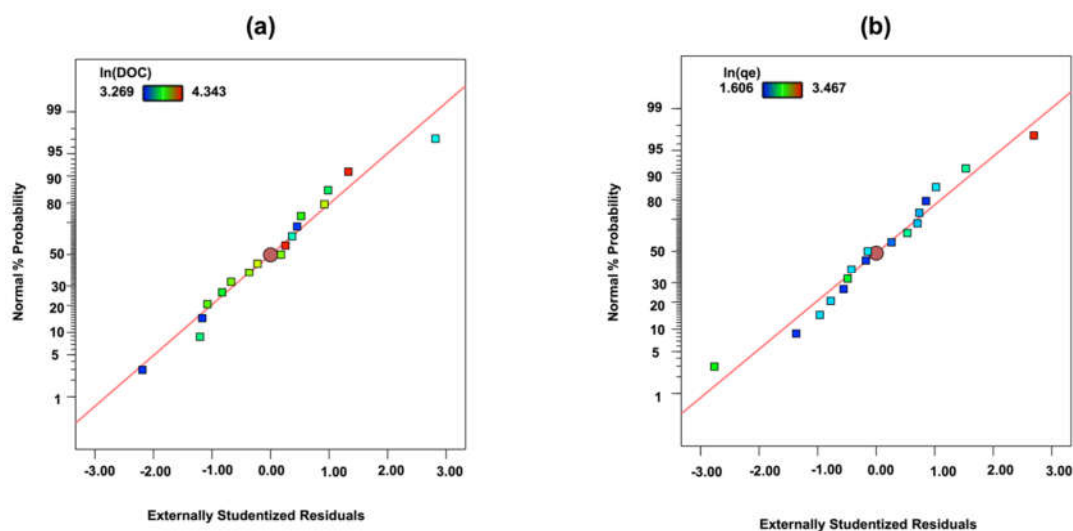

**Figure S1.** Plots of normal probability of residuals (a) DOC removal, (b) adsorption capacity ( $q_e$ ).

**Table S4.** Modeling results for equilibrium isotherms of natural and synthesized water sample.

| Model      | Adsorbent   | Water Sample | Parameters     |            | R <sup>2</sup> |
|------------|-------------|--------------|----------------|------------|----------------|
| Freundlich | 1.00% Al-AC | Natural      | $K_f = 25.75,$ | $n = 1.78$ | 0.95           |
|            | 1.00% Al-AC | Synthesized  | $K_f = 4.39,$  | $n = 1.33$ | 0.94           |
|            | 0.75% Fe-AC | Natural      | $K_f = 16.56,$ | $n = 1.54$ | 0.97           |
|            | 0.75% Fe-AC | Synthesized  | $K_f = 4.51,$  | $n = 1.51$ | 0.87           |
|            | AC-A10      | Natural      | $K_f = 20.54,$ | $n = 1.90$ | 0.93           |
|            | AC-A10      | Synthesized  | $K_f = N/A,$   | $n = N/A$  | 0.63           |
| Temkin     | 1.00% Al-AC | Natural      | $B = 25.01$    |            | 0.95           |
|            | 1.00% Al-AC | Synthesized  | $B = 11.95$    |            | 0.93           |
|            | 0.75% Fe-AC | Natural      | $B = 26.71$    |            | 0.99           |
|            | 0.75% Fe-AC | Synthesized  | $B = 9.47$     |            | 0.85           |
|            | AC-A10      | Natural      | $B = 20.54$    |            | 0.98           |
|            | AC-A10      | Synthesized  | $B = N/A$      |            | 0.52           |
